# Supplementary material for: Repetitive Elements May Comprise Over Two-Thirds of the Human Genome
Source: PLOS journal article supplement (doi:10.1371/journal.pgen.1002384), 2011-12-01
Supplement: S2 (10.1371/journal.pgen.1002384.s002) [file journal.pgen.1002384.s002]

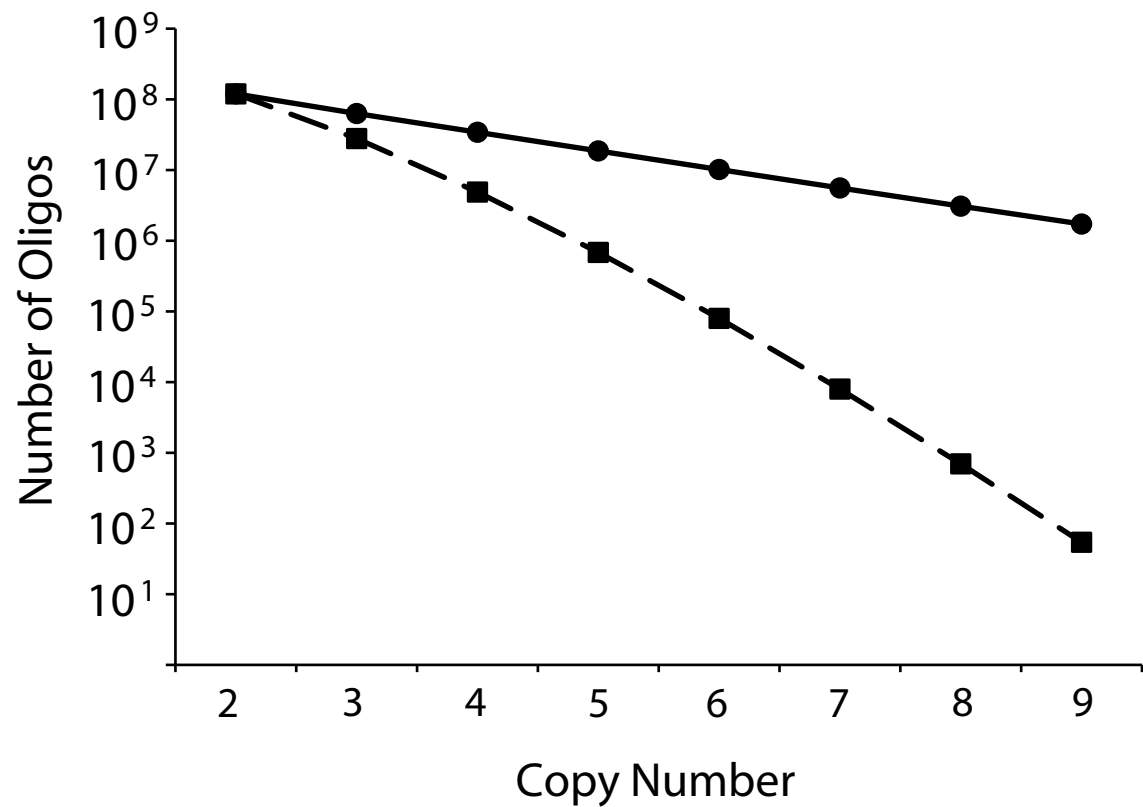

Figure S2
