# Supplementary material for: Repetitive Elements May Comprise Over Two-Thirds of the Human Genome
Source: PLoS Genet. 2011 Dec 1;7(12):e1002384. doi: 10.1371/journal.pgen.1002384 (PMC3228813; doi:10.1371/journal.pgen.1002384)
Supplement: Table S7 — Summary of the novel de novo P-clouds repeat predictions for the human genome (any overlapping RepeatMasker results subtracted), with length-dependent false positive estimates and expected true positives. (XLSX) [file pgen.1002384.s009.xlsx]

## Sheet: Sheet1
Supplementary Table S7. Novel P-Clouds annotated repetitive elements with FP probability from simulation (length can be smaller than 24bp here because of subtractive removal of RM regions)
Length		# found	# bp found	FP		Expected TP bps
2		174061	348122	0.0140165		343243
3		174930	524790	0.0140165		517434
4		166703	666812	0.0140165		657466
5		165536	827680	0.0140165		816079
6		164527	987162	0.0140165		973325
7		160818	1125726	0.0140165		1.10995e+06
8		159947	1279576	0.0140165		1.26164e+06
9		159280	1433520	0.0140165		1.41343e+06
10		153351	1533510	0.0140165		1.51202e+06
11		148383	1632213	0.0140165		1.60934e+06
12		137516	1650192	0.0140165		1.62706e+06
13		129350	1681550	0.0140165		1.65798e+06
14		114074	1597036	0.0140165		1.57465e+06
15		104656	1569840	0.0140165		1.54784e+06
16		89085	1425360	0.0140165		1.40538e+06
17		84577	1437809	0.0140165		1.41766e+06
18		78908	1420344	0.0140165		1.40044e+06
19		75734	1438946	0.0140165		1.41878e+06
20		74181	1483620	0.0140165		1.46282e+06
21		74437	1563177	0.0140165		1.54127e+06
22		74158	1631476	0.0140165		1.60861e+06
23		74279	1708417	0.0140165		1.68447e+06
24		1215361	29168664	0.0140165		2.87598e+07
25		800856	20021400	0.00829068		1.98554e+07
26		713640	18554640	0.00788959		1.84083e+07
27		669460	18075420	0.00791703		1.79323e+07
28		637177	17840956	0.00806238		1.76971e+07
29		608163	17636727	0.00835851		1.74893e+07
30		586190	17585700	0.00834755		1.74389e+07
31		550190	17055890	0.0077799		1.69232e+07
32		504381	16140192	0.00687723		1.60292e+07
33		454975	15014175	0.00578322		1.49273e+07
34		401822	13661948	0.00464873		1.35984e+07
35		369227	12922945	0.00387985		1.28728e+07
36		341708	12301488	0.00322588		1.22618e+07
37		317523	11748351	0.00265755		1.17171e+07
38		293793	11164134	0.00217967		1.11398e+07
39		272424	10624536	0.00178389		1.06056e+07
40		250747	10029880	0.0014428		1.00154e+07
41		238108	9762428	0.00122482		9.75047e+06
42		225750	9481500	0.00105394		9.47151e+06
43		216364	9303652	0.000943938		9.29487e+06
44		208720	9183680	0.000874737		9.17565e+06
45		203069	9138105	0.000824845		9.13057e+06
46		198336	9123456	0.000811232		9.11605e+06
47		195309	9179523	0.000806038		9.17212e+06
48		193709	9298032	0.000822397		9.29039e+06
49		188577	9240273	0.000832295		9.23258e+06
50		183826	9191300	0.000844511	462821227	9.18354e+06	4.62707e+08
51		179241	9141291	0.000859416		9.13343e+06
52		174753	9087156	0.000859325		9.07935e+06
53		169506	8983818	0.000864717		8.97605e+06
54		163523	8830242	0.000846489		8.82277e+06
55		158431	8713705	0.000821252		8.70655e+06
56		152007	8512392	0.000792819		8.50564e+06
57		146747	8364579	0.000750464		8.3583e+06
58		139777	8107066	0.000721117		8.10122e+06
59		135635	8002465	0.000683868		7.99699e+06
60		129643	7778580	0.000637403		7.77362e+06
61		124316	7583276	0.000578091		7.57889e+06
62		119998	7439876	0.000526424		7.43596e+06
63		115004	7245252	0.000474596		7.24181e+06
64		110373	7063872	0.000421481		7.06089e+06
65		105585	6863025	0.000377551		6.86043e+06
66		102479	6763614	0.000331417		6.76137e+06
67		98260	6583420	0.000291159		6.5815e+06
68		95087	6465916	0.000254175		6.46427e+06
69		91316	6300804	0.000225583		6.29938e+06
70		87587	6131090	0.000203468		6.12984e+06
71		85240	6052040	0.000179682		6.05095e+06
72		81822	5891184	0.000163855		5.89022e+06
73		79311	5789703	0.00015781		5.78879e+06
74		76965	5695410	0.000145127		5.69458e+06
75		74452	5583900	0.000134726		5.58315e+06
76		72526	5511976	0.000128153		5.51127e+06
77		69489	5350653	0.000118011		5.35002e+06
78		67466	5262348	0.000115495		5.26174e+06
79		65042	5138318	0.000105616		5.13778e+06
80		62916	5033280	0.000101846		5.03277e+06
81		61290	4964490	9.78073e-05		4.964e+06
82		59199	4854318	9.68291e-05		4.85385e+06
83		56587	4696721	8.84622e-05		4.69631e+06
84		55620	4672080	8.73186e-05		4.67167e+06
85		53628	4558380	7.97727e-05		4.55802e+06
86		51713	4447318	7.54933e-05		4.44698e+06
87		49591	4314417	7.01467e-05		4.31411e+06
88		48073	4230424	6.68174e-05		4.23014e+06
89		46781	4163509	5.97734e-05		4.16326e+06
90		45045	4054050	5.88037e-05		4.05381e+06
91		43718	3978338	5.37443e-05		3.97812e+06
92		42539	3913588	5.11406e-05		3.91339e+06
93		40850	3799050	4.60213e-05		3.79888e+06
94		39645	3726630	3.84723e-05		3.72649e+06
95		38048	3614560	3.64494e-05		3.61443e+06
96		37279	3578784	3.25235e-05		3.57867e+06
97		35817	3474249	3.0549e-05		3.47414e+06
98		34767	3407166	2.8355e-05		3.40707e+06
99		33946	3360654	2.29502e-05		3.36058e+06
100		32946	3294600	2.01659e-05		3.29453e+06
101		31771	3208871	2.23511e-05		3.2088e+06
102		31016	3163632	1.72066e-05		3.16358e+06
103		29953	3085159	1.79894e-05		3.0851e+06
104		28890	3004560	1.72522e-05		3.00451e+06
105		27996	2939580	1.554e-05		2.93953e+06
106		27135	2876310	1.23794e-05		2.87627e+06
107		26378	2822446	1.30591e-05		2.82241e+06
108		25350	2737800	1.27645e-05		2.73777e+06
109		24937	2718133	1.28444e-05		2.7181e+06
110		24265	2669150	1.04547e-05		2.66912e+06
111		23529	2611719	1.07833e-05		2.61169e+06
112		22901	2564912	9.70206e-06		2.56489e+06
113		22271	2516623	9.03571e-06		2.5166e+06
114		21570	2458980	8.79582e-06		2.45896e+06
115		20768	2388320	8.99398e-06		2.3883e+06
116		20053	2326148	7.07875e-06		2.32613e+06
117		19563	2288871	8.08353e-06		2.28885e+06
118		18842	2223356	7.28356e-06		2.22334e+06
119		18367	2185673	5.6759e-06		2.18566e+06
120		18005	2160600	4.96606e-06		2.16059e+06
121		17538	2122098	4.96501e-06		2.12209e+06
122		16795	2048990	4.1931e-06		2.04898e+06
123		16458	2024334	4.09805e-06		2.02433e+06
124		15949	1977676	3.52254e-06		1.97767e+06
125		15283	1910375	3.37559e-06		1.91037e+06
126		15144	1908144	3.22584e-06		1.90814e+06
127		14571	1850517	2.85058e-06		1.85051e+06
128		14084	1802752	2.87302e-06		1.80275e+06
129		13771	1776459	2.57878e-06		1.77645e+06
130		13380	1739400	2.14284e-06		1.7394e+06
131		13047	1709157	2.15933e-06		1.70915e+06
132		12742	1681944	1.85175e-06		1.68194e+06
133		12257	1630181	1.53927e-06		1.63018e+06
134		11912	1596208	1.78582e-06		1.59621e+06
135		11544	1558440	1.04161e-06		1.55844e+06
136		11445	1556520	1.3832e-06		1.55652e+06
137		10909	1494533	1.63361e-06		1.49453e+06
138		10741	1482258	1.01636e-06		1.48226e+06
139		10204	1418356	8.28729e-07		1.41835e+06
140		10064	1408960	1.03109e-06		1.40896e+06
141		9839	1387299	8.40654e-07		1.3873e+06
142		9657	1371294	9.96018e-07		1.37129e+06
143		9411	1345773	9.52881e-07		1.34577e+06
144		9048	1302912	8.08037e-07		1.30291e+06
145		8862	1284990	1.01706e-06		1.28499e+06
146		8518	1243628	5.63241e-07		1.24363e+06
147		8331	1224657	4.12436e-07		1.22466e+06
148		8076	1195248	8.30483e-07		1.19525e+06
149		7981	1189169	7.31583e-07		1.18917e+06
150		7668	1150200	4.73459e-07		1.1502e+06
151		7392	1116192	6.88445e-07		1.11619e+06
152		7262	1103824	6.93004e-07		1.10382e+06
153		7119	1089207	4.82929e-07		1.08921e+06
154		6951	1070454	2.16038e-07		1.07045e+06
155		6753	1046715	3.26161e-07		1.04671e+06
156		6426	1002456	3.28265e-07		1.00246e+06
157		6371	1000247	1.10123e-07		1.00025e+06
158		6183	976914	2.21649e-07		976914
159		5966	948594	2.23052e-07		948594
160		5924	947840	2.24455e-07		947840
161		5685	915285	2.82322e-07		915285
162		5686	921132	2.27261e-07		921132
163		5481	893403	1.14332e-07		893403
164		5383	882812	1.15033e-07		882812
165		5119	844635	2.31469e-07		844635
166		4945	820870	5.8218e-08		820870
167		4872	813624	1.17137e-07		813624
168		4764	800352	5.89194e-08		800352
169		4558	770302	1.1854e-07		770302
170		4520	768400	5.96208e-08		768400
171		4325	739575	5.99715e-08		739575
172		4190	720680	1.20644e-07		720680
173		4141	716393	1.21346e-07		716393
174		3955	688170	1.83071e-07		688170
175		3930	687750	6.13744e-08		687750
176		3825	673200	1.2345e-07		673200
177		3709	656493	6.20758e-08		656493
178		3728	663584	2.49706e-07		663584
179		3514	629006	6.27772e-08		629006
180		3507	631260	6.31279e-08		631260
181		3337	603997	1.26957e-07		603997
182		3310	602420	1.27659e-07		602420
183		3292	602436	6.41801e-08		602436
184		3179	584936	1.29062e-07		584936
185		3061	566285	6.48815e-08		566285
186		2963	551118	1.30464e-07		551118
187		2860	534820	1.31166e-07		534820
188		2799	526212	6.59336e-08		526212
189		2683	507087	6.62843e-08		507087
190		2718	516420	6.6635e-08		516420
191		2634	503094	6.69857e-08		503094
192		2566	492672	6.73365e-08		492672
193		2515	485395	6.76872e-08		485395
194		2387	463078	6.80379e-08		463078
195		2437	475215	6.83886e-08		475215
196		2280	446880	6.87393e-08		446880
197		2158	425126	6.909e-08		425126
198		2114	418572	6.94407e-08		418572
199		2161	430039	6.97914e-08		430039
200		2153	430600	7.01421e-08		430600
201		1992	400392	7.04929e-08		400392
202		1978	399556	7.08436e-08		399556
203		1831	371693	7.11943e-08		371693
204		1917	391068	7.1545e-08		391068
205		1924	394420	7.18957e-08		394420
206		1798	370388	7.22464e-08		370388
207		1738	359766	7.25971e-08		359766
208		1656	344448	7.29478e-08		344448
209		1670	349030	7.32985e-08		349030
210		1639	344190	7.36492e-08		344190
211		1579	333169	7.4e-08		333169
212		1535	325420	7.43507e-08		325420
213		1543	328659	7.47014e-08		328659
214		1516	324424	7.50521e-08		324424
215		1494	321210	7.54028e-08		321210
216		1449	312984	0		312984
217		1388	301196	0		301196
218		1294	282092	0		282092
219		1360	297840	0		297840
220		1265	278300	0		278300
221		1234	272714	0		272714
222		1116	247752	0		247752
223		1127	251321	0		251321
224		1151	257824	0		257824
225		1180	265500	0		265500
226		1100	248600	0		248600
227		1160	263320	0		263320
228		1048	238944	0		238944
229		992	227168	0		227168
230		981	225630	0		225630
231		1025	236775	0		236775
232		989	229448	0		229448
233		940	219020	0		219020
234		930	217620	0		217620
235		915	215025	0		215025
236		876	206736	0		206736
237		867	205479	0		205479
238		837	199206	0		199206
239		772	184508	0		184508
240		783	187920	0		187920
241		820	197620	0		197620
242		772	186824	0		186824
243		766	186138	0		186138
244		719	175436	0		175436
245		741	181545	0		181545
246		714	175644	0		175644
247		662	163514	0		163514
248		685	169880	0		169880
249		695	173055	0		173055
250		610	152500	0		152500
251		628	157628	0		157628
252		605	152460	0		152460
253		616	155848	0		155848
254		627	159258	0		159258
255		587	149685	0		149685
256		570	145920	0		145920
257		537	138009	0		138009
258		546	140868	0		140868
259		531	137529	0		137529
260		517	134420	0		134420
261		523	136503	0		136503
262		486	127332	0		127332
263		438	115194	0		115194
264		442	116688	0		116688
265		446	118190	0		118190
266		437	116242	0		116242
267		438	116946	0		116946
268		402	107736	0		107736
269		406	109214	0		109214
270		414	111780	0		111780
271		432	117072	0		117072
272		408	110976	0		110976
273		398	108654	0		108654
274		322	88228	0		88228
275		343	94325	0		94325
276		376	103776	0		103776
277		326	90302	0		90302
278		368	102304	0		102304
279		361	100719	0		100719
280		343	96040	0		96040
281		360	101160	0		101160
282		327	92214	0		92214
283		310	87730	0		87730
284		303	86052	0		86052
285		301	85785	0		85785
286		283	80938	0		80938
287		284	81508	0		81508
288		303	87264	0		87264
289		264	76296	0		76296
290		286	82940	0		82940
291		254	73914	0		73914
292		229	66868	0		66868
293		297	87021	0		87021
294		236	69384	0		69384
295		264	77880	0		77880
296		244	72224	0		72224
297		245	72765	0		72765
298		223	66454	0		66454
299		227	67873	0		67873
300		235	70500	0		70500
301		238	71638	0		71638
302		205	61910	0		61910
303		210	63630	0		63630
304		182	55328	0		55328
305		200	61000	0		61000
306		210	64260	0		64260
307		208	63856	0		63856
308		188	57904	0		57904
309		208	64272	0		64272
310		191	59210	0		59210
311		177	55047	0		55047
312		170	53040	0		53040
313		171	53523	0		53523
314		183	57462	0		57462
315		179	56385	0		56385
316		178	56248	0		56248
317		150	47550	0		47550
318		165	52470	0		52470
319		163	51997	0		51997
320		138	44160	0		44160
321		182	58422	0		58422
322		153	49266	0		49266
323		153	49419	0		49419
324		153	49572	0		49572
325		143	46475	0		46475
326		136	44336	0		44336
327		152	49704	0		49704
328		118	38704	0		38704
329		116	38164	0		38164
330		121	39930	0		39930
331		132	43692	0		43692
332		105	34860	0		34860
333		135	44955	0		44955
334		136	45424	0		45424
335		125	41875	0		41875
336		123	41328	0		41328
337		118	39766	0		39766
338		119	40222	0		40222
339		111	37629	0		37629
340		115	39100	0		39100
341		91	31031	0		31031
342		118	40356	0		40356
343		114	39102	0		39102
344		98	33712	0		33712
345		120	41400	0		41400
346		129	44634	0		44634
347		93	32271	0		32271
348		123	42804	0		42804
349		85	29665	0		29665
350		82	28700	0		28700
351		109	38259	0		38259
352		83	29216	0		29216
353		96	33888	0		33888
354		92	32568	0		32568
355		103	36565	0		36565
356		88	31328	0		31328
357		71	25347	0		25347
358		81	28998	0		28998
359		73	26207	0		26207
360		71	25560	0		25560
361		84	30324	0		30324
362		74	26788	0		26788
363		65	23595	0		23595
364		88	32032	0		32032
365		67	24455	0		24455
366		91	33306	0		33306
367		71	26057	0		26057
368		73	26864	0		26864
369		66	24354	0		24354
370		67	24790	0		24790
371		79	29309	0		29309
372		74	27528	0		27528
373		78	29094	0		29094
374		45	16830	0		16830
375		72	27000	0		27000
376		78	29328	0		29328
377		67	25259	0		25259
378		55	20790	0		20790
379		60	22740	0		22740
380		67	25460	0		25460
381		63	24003	0		24003
382		39	14898	0		14898
383		63	24129	0		24129
384		48	18432	0		18432
385		59	22715	0		22715
386		63	24318	0		24318
387		55	21285	0		21285
388		49	19012	0		19012
389		63	24507	0		24507
390		43	16770	0		16770
391		53	20723	0		20723
392		46	18032	0		18032
393		53	20829	0		20829
394		55	21670	0		21670
395		55	21725	0		21725
396		43	17028	0		17028
397		45	17865	0		17865
398		47	18706	0		18706
399		49	19551	0		19551
400		35	14000	0		14000
401		66	26466	0		26466
402		31	12462	0		12462
403		46	18538	0		18538
404		44	17776	0		17776
405		50	20250	0		20250
406		41	16646	0		16646
407		54	21978	0		21978
408		31	12648	0		12648
409		48	19632	0		19632
410		47	19270	0		19270
411		33	13563	0		13563
412		24	9888	0		9888
413		51	21063	0		21063
414		38	15732	0		15732
415		37	15355	0		15355
416		32	13312	0		13312
417		42	17514	0		17514
418		48	20064	0		20064
419		33	13827	0		13827
420		46	19320	0		19320
421		35	14735	0		14735
422		45	18990	0		18990
423		36	15228	0		15228
424		24	10176	0		10176
425		29	12325	0		12325
426		34	14484	0		14484
427		31	13237	0		13237
428		27	11556	0		11556
429		27	11583	0		11583
430		26	11180	0		11180
431		29	12499	0		12499
432		33	14256	0		14256
433		32	13856	0		13856
434		24	10416	0		10416
435		29	12615	0		12615
436		28	12208	0		12208
437		37	16169	0		16169
438		28	12264	0		12264
439		31	13609	0		13609
440		20	8800	0		8800
441		30	13230	0		13230
442		23	10166	0		10166
443		32	14176	0		14176
444		20	8880	0		8880
445		32	14240	0		14240
446		42	18732	0		18732
447		28	12516	0		12516
448		29	12992	0		12992
449		27	12123	0		12123
450		26	11700	0		11700
451		30	13530	0		13530
452		34	15368	0		15368
453		31	14043	0		14043
454		8	3632	0		3632
455		20	9100	0		9100
456		26	11856	0		11856
457		20	9140	0		9140
458		22	10076	0		10076
459		18	8262	0		8262
460		42	19320	0		19320
461		31	14291	0		14291
462		24	11088	0		11088
463		16	7408	0		7408
464		36	16704	0		16704
465		30	13950	0		13950
466		14	6524	0		6524
467		23	10741	0		10741
468		19	8892	0		8892
469		16	7504	0		7504
470		29	13630	0		13630
471		16	7536	0		7536
472		15	7080	0		7080
473		15	7095	0		7095
474		18	8532	0		8532
475		25	11875	0		11875
476		17	8092	0		8092
477		15	7155	0		7155
478		25	11950	0		11950
479		22	10538	0		10538
480		21	10080	0		10080
481		29	13949	0		13949
482		15	7230	0		7230
483		21	10143	0		10143
484		21	10164	0		10164
485		8	3880	0		3880
486		22	10692	0		10692
487		14	6818	0		6818
488		36	17568	0		17568
489		22	10758	0		10758
490		22	10780	0		10780
491		28	13748	0		13748
492		20	9840	0		9840
493		19	9367	0		9367
494		20	9880	0		9880
495		20	9900	0		9900
496		9	4464	0		4464
497		13	6461	0		6461
498		27	13446	0		13446
499		16	7984	0		7984
500		18	9000	0		9000
501		19	9519	0		9519
502		22	11044	0		11044
503		16	8048	0		8048
504		8	4032	0		4032
505		12	6060	0		6060
506		6	3036	0		3036
507		14	7098	0		7098
508		11	5588	0		5588
509		11	5599	0		5599
510		18	9180	0		9180
511		9	4599	0		4599
512		9	4608	0		4608
513		13	6669	0		6669
514		13	6682	0		6682
515		18	9270	0		9270
516		20	10320	0		10320
517		17	8789	0		8789
518		10	5180	0		5180
519		10	5190	0		5190
520		17	8840	0		8840
521		6	3126	0		3126
522		19	9918	0		9918
523		7	3661	0		3661
524		3	1572	0		1572
525		12	6300	0		6300
526		7	3682	0		3682
527		13	6851	0		6851
528		15	7920	0		7920
529		8	4232	0		4232
530		15	7950	0		7950
531		10	5310	0		5310
532		10	5320	0		5320
533		16	8528	0		8528
534		9	4806	0		4806
535		11	5885	0		5885
536		13	6968	0		6968
537		17	9129	0		9129
538		16	8608	0		8608
539		14	7546	0		7546
540		24	12960	0		12960
541		8	4328	0		4328
542		6	3252	0		3252
543		11	5973	0		5973
544		6	3264	0		3264
545		12	6540	0		6540
546		6	3276	0		3276
547		5	2735	0		2735
548		15	8220	0		8220
549		3	1647	0		1647
550		13	7150	0		7150
551		22	12122	0		12122
552		12	6624	0		6624
553		23	12719	0		12719
554		8	4432	0		4432
555		6	3330	0		3330
556		6	3336	0		3336
557		6	3342	0		3342
558		7	3906	0		3906
559		20	11180	0		11180
560		8	4480	0		4480
561		15	8415	0		8415
562		10	5620	0		5620
563		15	8445	0		8445
564		14	7896	0		7896
565		19	10735	0		10735
566		11	6226	0		6226
567		10	5670	0		5670
568		22	12496	0		12496
569		7	3983	0		3983
570		17	9690	0		9690
571		7	3997	0		3997
572		10	5720	0		5720
573		10	5730	0		5730
574		10	5740	0		5740
575		14	8050	0		8050
576		5	2880	0		2880
577		11	6347	0		6347
578		8	4624	0		4624
579		12	6948	0		6948
580		12	6960	0		6960
581		10	5810	0		5810
582		3	1746	0		1746
583		3	1749	0		1749
584		7	4088	0		4088
585		6	3510	0		3510
586		6	3516	0		3516
587		6	3522	0		3522
588		6	3528	0		3528
589		6	3534	0		3534
590		9	5310	0		5310
591		6	3546	0		3546
592		2	1184	0		1184
593		4	2372	0		2372
594		4	2376	0		2376
595		9	5355	0		5355
596		9	5364	0		5364
597		7	4179	0		4179
598		5	2990	0		2990
599		9	5391	0		5391
600		4	2400	0		2400
601		10	6010	0		6010
602		11	6622	0		6622
603		10	6030	0		6030
604		4	2416	0		2416
605		4	2420	0		2420
606		9	5454	0		5454
607		11	6677	0		6677
608		5	3040	0		3040
609		10	6090	0		6090
610		4	2440	0		2440
611		4	2444	0		2444
612		7	4284	0		4284
613		7	4291	0		4291
614		2	1228	0		1228
615		7	4305	0		4305
616		5	3080	0		3080
617		3	1851	0		1851
618		12	7416	0		7416
619		6	3714	0		3714
620		2	1240	0		1240
621		6	3726	0		3726
622		11	6842	0		6842
623		6	3738	0		3738
624		12	7488	0		7488
625		16	10000	0		10000
626		3	1878	0		1878
627		14	8778	0		8778
628		9	5652	0		5652
629		5	3145	0		3145
630		11	6930	0		6930
631		7	4417	0		4417
632		6	3792	0		3792
633		11	6963	0		6963
634		8	5072	0		5072
635		7	4445	0		4445
636		7	4452	0		4452
637		6	3822	0		3822
638		5	3190	0		3190
639		9	5751	0		5751
640		7	4480	0		4480
641		8	5128	0		5128
642		14	8988	0		8988
643		16	10288	0		10288
644		6	3864	0		3864
645		13	8385	0		8385
646		4	2584	0		2584
647		8	5176	0		5176
648		3	1944	0		1944
649		11	7139	0		7139
650		4	2600	0		2600
651		11	7161	0		7161
652		9	5868	0		5868
653		8	5224	0		5224
654		7	4578	0		4578
655		14	9170	0		9170
656		4	2624	0		2624
657		3	1971	0		1971
658		15	9870	0		9870
659		11	7249	0		7249
660		11	7260	0		7260
661		8	5288	0		5288
662		3	1986	0		1986
663		5	3315	0		3315
664		6	3984	0		3984
665		6	3990	0		3990
666		5	3330	0		3330
667		12	8004	0		8004
668		3	2004	0		2004
669		5	3345	0		3345
670		10	6700	0		6700
671		3	2013	0		2013
672		2	1344	0		1344
673		5	3365	0		3365
674		5	3370	0		3370
675		9	6075	0		6075
676		4	2704	0		2704
677		8	5416	0		5416
678		7	4746	0		4746
679		3	2037	0		2037
680		6	4080	0		4080
681		14	9534	0		9534
682		4	2728	0		2728
683		3	2049	0		2049
684		6	4104	0		4104
685		7	4795	0		4795
686		9	6174	0		6174
687		11	7557	0		7557
688		4	2752	0		2752
689		5	3445	0		3445
690		3	2070	0		2070
691		8	5528	0		5528
692		7	4844	0		4844
694		8	5552	0		5552
695		18	12510	0		12510
696		4	2784	0		2784
697		13	9061	0		9061
698		8	5584	0		5584
699		4	2796	0		2796
700		3	2100	0		2100
701		5	3505	0		3505
702		16	11232	0		11232
703		5	3515	0		3515
704		4	2816	0		2816
705		14	9870	0		9870
706		12	8472	0		8472
707		4	2828	0		2828
708		1	708	0		708
709		3	2127	0		2127
710		4	2840	0		2840
711		8	5688	0		5688
712		1	712	0		712
713		1	713	0		713
714		6	4284	0		4284
715		2	1430	0		1430
716		1	716	0		716
717		1	717	0		717
718		2	1436	0		1436
719		3	2157	0		2157
720		5	3600	0		3600
721		2	1442	0		1442
722		2	1444	0		1444
723		1	723	0		723
724		2	1448	0		1448
725		3	2175	0		2175
726		1	726	0		726
727		5	3635	0		3635
728		5	3640	0		3640
729		6	4374	0		4374
730		3	2190	0		2190
731		10	7310	0		7310
732		6	4392	0		4392
733		4	2932	0		2932
734		9	6606	0		6606
735		6	4410	0		4410
736		3	2208	0		2208
737		2	1474	0		1474
738		5	3690	0		3690
739		9	6651	0		6651
740		6	4440	0		4440
741		4	2964	0		2964
742		27	20034	0		20034
744		5	3720	0		3720
745		9	6705	0		6705
746		10	7460	0		7460
747		2	1494	0		1494
748		4	2992	0		2992
749		3	2247	0		2247
750		4	3000	0		3000
751		6	4506	0		4506
752		7	5264	0		5264
753		4	3012	0		3012
754		2	1508	0		1508
755		6	4530	0		4530
756		3	2268	0		2268
757		10	7570	0		7570
758		2	1516	0		1516
759		2	1518	0		1518
760		9	6840	0		6840
761		10	7610	0		7610
762		3	2286	0		2286
763		4	3052	0		3052
764		5	3820	0		3820
765		4	3060	0		3060
766		6	4596	0		4596
768		9	6912	0		6912
769		4	3076	0		3076
770		4	3080	0		3080
772		4	3088	0		3088
773		1	773	0		773
774		7	5418	0		5418
775		8	6200	0		6200
776		2	1552	0		1552
777		1	777	0		777
778		2	1556	0		1556
779		4	3116	0		3116
780		5	3900	0		3900
781		3	2343	0		2343
782		6	4692	0		4692
783		2	1566	0		1566
784		4	3136	0		3136
785		4	3140	0		3140
786		9	7074	0		7074
787		3	2361	0		2361
788		5	3940	0		3940
789		3	2367	0		2367
790		9	7110	0		7110
791		7	5537	0		5537
792		1	792	0		792
793		3	2379	0		2379
794		2	1588	0		1588
795		6	4770	0		4770
796		5	3980	0		3980
797		1	797	0		797
798		4	3192	0		3192
799		3	2397	0		2397
800		4	3200	0		3200
801		1	801	0		801
802		14	11228	0		11228
803		1	803	0		803
804		4	3216	0		3216
805		5	4025	0		4025
806		5	4030	0		4030
807		4	3228	0		3228
808		4	3232	0		3232
809		7	5663	0		5663
810		2	1620	0		1620
811		2	1622	0		1622
812		2	1624	0		1624
813		5	4065	0		4065
814		5	4070	0		4070
815		4	3260	0		3260
816		5	4080	0		4080
817		6	4902	0		4902
818		3	2454	0		2454
819		5	4095	0		4095
820		5	4100	0		4100
821		6	4926	0		4926
822		5	4110	0		4110
823		5	4115	0		4115
824		6	4944	0		4944
825		3	2475	0		2475
826		13	10738	0		10738
827		1	827	0		827
828		2	1656	0		1656
829		2	1658	0		1658
830		3	2490	0		2490
831		3	2493	0		2493
832		2	1664	0		1664
833		2	1666	0		1666
834		2	1668	0		1668
835		1	835	0		835
836		4	3344	0		3344
837		1	837	0		837
838		3	2514	0		2514
839		2	1678	0		1678
840		3	2520	0		2520
843		2	1686	0		1686
844		2	1688	0		1688
845		2	1690	0		1690
846		4	3384	0		3384
847		4	3388	0		3388
848		1	848	0		848
849		1	849	0		849
850		2	1700	0		1700
851		2	1702	0		1702
852		3	2556	0		2556
853		1	853	0		853
854		1	854	0		854
855		5	4275	0		4275
856		5	4280	0		4280
857		15	12855	0		12855
858		1	858	0		858
859		4	3436	0		3436
860		1	860	0		860
861		9	7749	0		7749
862		2	1724	0		1724
864		2	1728	0		1728
865		3	2595	0		2595
866		1	866	0		866
867		2	1734	0		1734
868		1	868	0		868
869		9	7821	0		7821
870		1	870	0		870
871		1	871	0		871
873		2	1746	0		1746
874		2	1748	0		1748
875		2	1750	0		1750
876		5	4380	0		4380
878		3	2634	0		2634
879		4	3516	0		3516
880		4	3520	0		3520
881		11	9691	0		9691
882		1	882	0		882
883		1	883	0		883
884		5	4420	0		4420
885		10	8850	0		8850
886		1	886	0		886
887		2	1774	0		1774
888		2	1776	0		1776
889		2	1778	0		1778
890		2	1780	0		1780
892		4	3568	0		3568
893		2	1786	0		1786
896		2	1792	0		1792
897		1	897	0		897
898		6	5388	0		5388
899		2	1798	0		1798
900		3	2700	0		2700
901		2	1802	0		1802
903		2	1806	0		1806
904		3	2712	0		2712
905		3	2715	0		2715
906		4	3624	0		3624
907		5	4535	0		4535
908		5	4540	0		4540
909		3	2727	0		2727
910		1	910	0		910
912		3	2736	0		2736
913		3	2739	0		2739
914		4	3656	0		3656
915		8	7320	0		7320
916		1	916	0		916
917		3	2751	0		2751
918		1	918	0		918
919		4	3676	0		3676
920		1	920	0		920
921		4	3684	0		3684
923		4	3692	0		3692
924		7	6468	0		6468
925		3	2775	0		2775
926		3	2778	0		2778
927		5	4635	0		4635
928		2	1856	0		1856
929		1	929	0		929
930		4	3720	0		3720
931		4	3724	0		3724
932		3	2796	0		2796
933		1	933	0		933
934		1	934	0		934
935		1	935	0		935
936		8	7488	0		7488
937		6	5622	0		5622
938		4	3752	0		3752
939		4	3756	0		3756
940		12	11280	0		11280
941		2	1882	0		1882
943		7	6601	0		6601
944		9	8496	0		8496
945		2	1890	0		1890
946		2	1892	0		1892
947		3	2841	0		2841
948		1	948	0		948
949		5	4745	0		4745
950		4	3800	0		3800
951		1	951	0		951
952		6	5712	0		5712
953		2	1906	0		1906
955		1	955	0		955
956		2	1912	0		1912
958		1	958	0		958
959		1	959	0		959
960		1	960	0		960
961		1	961	0		961
962		1	962	0		962
963		4	3852	0		3852
964		8	7712	0		7712
965		6	5790	0		5790
966		2	1932	0		1932
967		3	2901	0		2901
968		5	4840	0		4840
970		4	3880	0		3880
972		1	972	0		972
973		1	973	0		973
975		2	1950	0		1950
977		1	977	0		977
978		2	1956	0		1956
979		2	1958	0		1958
980		3	2940	0		2940
981		1	981	0		981
983		1	983	0		983
990		3	2970	0		2970
991		2	1982	0		1982
992		4	3968	0		3968
993		2	1986	0		1986
994		6	5964	0		5964
995		3	2985	0		2985
996		1	996	0		996
997		3	2991	0		2991
998		2	1996	0		1996
999		2	1998	0		1998
1001		2	2002	0		2002
1002		1	1002	0		1002
1003		1	1003	0		1003
1004		3	3012	0		3012
1006		1	1006	0		1006
1007		7	7049	0		7049
1008		2	2016	0		2016
1009		1	1009	0		1009
1010		1	1010	0		1010
1011		1	1011	0		1011
1012		6	6072	0		6072
1013		1	1013	0		1013
1016		1	1016	0		1016
1017		1	1017	0		1017
1018		1	1018	0		1018
1019		1	1019	0		1019
1020		2	2040	0		2040
1021		1	1021	0		1021
1022		1	1022	0		1022
1023		1	1023	0		1023
1024		2	2048	0		2048
1025		6	6150	0		6150
1026		5	5130	0		5130
1027		1	1027	0		1027
1028		1	1028	0		1028
1029		1	1029	0		1029
1032		3	3096	0		3096
1033		1	1033	0		1033
1034		3	3102	0		3102
1038		3	3114	0		3114
1039		1	1039	0		1039
1040		4	4160	0		4160
1041		1	1041	0		1041
1042		2	2084	0		2084
1043		1	1043	0		1043
1044		1	1044	0		1044
1045		3	3135	0		3135
1047		1	1047	0		1047
1048		1	1048	0		1048
1049		3	3147	0		3147
1050		3	3150	0		3150
1051		4	4204	0		4204
1052		7	7364	0		7364
1053		2	2106	0		2106
1054		1	1054	0		1054
1055		1	1055	0		1055
1056		4	4224	0		4224
1057		2	2114	0		2114
1058		1	1058	0		1058
1059		2	2118	0		2118
1060		1	1060	0		1060
1062		2	2124	0		2124
1063		1	1063	0		1063
1065		1	1065	0		1065
1066		2	2132	0		2132
1067		2	2134	0		2134
1068		1	1068	0		1068
1069		1	1069	0		1069
1070		1	1070	0		1070
1072		1	1072	0		1072
1073		3	3219	0		3219
1075		1	1075	0		1075
1076		4	4304	0		4304
1077		1	1077	0		1077
1078		2	2156	0		2156
1079		3	3237	0		3237
1081		1	1081	0		1081
1082		2	2164	0		2164
1083		5	5415	0		5415
1084		5	5420	0		5420
1085		8	8680	0		8680
1086		5	5430	0		5430
1087		1	1087	0		1087
1088		1	1088	0		1088
1089		4	4356	0		4356
1091		1	1091	0		1091
1093		16	17488	0		17488
1094		1	1094	0		1094
1096		1	1096	0		1096
1097		1	1097	0		1097
1098		3	3294	0		3294
1099		2	2198	0		2198
1100		2	2200	0		2200
1101		2	2202	0		2202
1102		1	1102	0		1102
1103		1	1103	0		1103
1105		1	1105	0		1105
1106		1	1106	0		1106
1107		1	1107	0		1107
1108		1	1108	0		1108
1110		12	13320	0		13320
1111		2	2222	0		2222
1112		2	2224	0		2224
1113		1	1113	0		1113
1114		1	1114	0		1114
1115		2	2230	0		2230
1117		3	3351	0		3351
1118		3	3354	0		3354
1119		2	2238	0		2238
1122		1	1122	0		1122
1123		3	3369	0		3369
1124		4	4496	0		4496
1125		2	2250	0		2250
1126		1	1126	0		1126
1127		2	2254	0		2254
1128		1	1128	0		1128
1129		3	3387	0		3387
1134		3	3402	0		3402
1135		4	4540	0		4540
1136		4	4544	0		4544
1137		10	11370	0		11370
1138		2	2276	0		2276
1139		1	1139	0		1139
1140		1	1140	0		1140
1145		1	1145	0		1145
1146		1	1146	0		1146
1147		3	3441	0		3441
1148		3	3444	0		3444
1149		1	1149	0		1149
1150		4	4600	0		4600
1151		1	1151	0		1151
1152		5	5760	0		5760
1153		3	3459	0		3459
1154		2	2308	0		2308
1155		2	2310	0		2310
1156		1	1156	0		1156
1157		1	1157	0		1157
1159		3	3477	0		3477
1160		2	2320	0		2320
1161		4	4644	0		4644
1162		2	2324	0		2324
1163		3	3489	0		3489
1166		1	1166	0		1166
1167		1	1167	0		1167
1168		1	1168	0		1168
1170		3	3510	0		3510
1172		1	1172	0		1172
1173		1	1173	0		1173
1174		1	1174	0		1174
1175		1	1175	0		1175
1176		1	1176	0		1176
1178		1	1178	0		1178
1179		1	1179	0		1179
1180		1	1180	0		1180
1181		1	1181	0		1181
1185		2	2370	0		2370
1187		1	1187	0		1187
1189		2	2378	0		2378
1192		1	1192	0		1192
1193		4	4772	0		4772
1195		2	2390	0		2390
1196		1	1196	0		1196
1197		2	2394	0		2394
1199		1	1199	0		1199
1200		1	1200	0		1200
1201		3	3603	0		3603
1203		1	1203	0		1203
1205		1	1205	0		1205
1206		2	2412	0		2412
1207		2	2414	0		2414
1208		1	1208	0		1208
1210		1	1210	0		1210
1211		1	1211	0		1211
1214		1	1214	0		1214
1216		1	1216	0		1216
1219		1	1219	0		1219
1220		1	1220	0		1220
1222		1	1222	0		1222
1223		2	2446	0		2446
1224		1	1224	0		1224
1226		1	1226	0		1226
1229		2	2458	0		2458
1230		1	1230	0		1230
1231		1	1231	0		1231
1233		1	1233	0		1233
1235		1	1235	0		1235
1236		2	2472	0		2472
1238		2	2476	0		2476
1240		1	1240	0		1240
1241		1	1241	0		1241
1242		1	1242	0		1242
1243		1	1243	0		1243
1244		2	2488	0		2488
1245		1	1245	0		1245
1246		1	1246	0		1246
1247		2	2494	0		2494
1248		8	9984	0		9984
1249		1	1249	0		1249
1250		1	1250	0		1250
1251		2	2502	0		2502
1255		5	6275	0		6275
1256		1	1256	0		1256
1257		2	2514	0		2514
1262		1	1262	0		1262
1264		1	1264	0		1264
1266		1	1266	0		1266
1268		5	6340	0		6340
1269		2	2538	0		2538
1270		1	1270	0		1270
1272		16	20352	0		20352
1274		3	3822	0		3822
1275		1	1275	0		1275
1276		1	1276	0		1276
1278		1	1278	0		1278
1279		4	5116	0		5116
1281		1	1281	0		1281
1282		1	1282	0		1282
1283		1	1283	0		1283
1284		1	1284	0		1284
1285		2	2570	0		2570
1286		1	1286	0		1286
1288		2	2576	0		2576
1292		1	1292	0		1292
1293		1	1293	0		1293
1294		2	2588	0		2588
1297		1	1297	0		1297
1302		2	2604	0		2604
1304		1	1304	0		1304
1307		1	1307	0		1307
1309		1	1309	0		1309
1310		1	1310	0		1310
1313		1	1313	0		1313
1314		1	1314	0		1314
1316		1	1316	0		1316
1318		1	1318	0		1318
1320		1	1320	0		1320
1321		1	1321	0		1321
1322		2	2644	0		2644
1327		1	1327	0		1327
1329		1	1329	0		1329
1333		8	10664	0		10664
1335		1	1335	0		1335
1336		2	2672	0		2672
1337		1	1337	0		1337
1339		1	1339	0		1339
1342		2	2684	0		2684
1344		1	1344	0		1344
1346		1	1346	0		1346
1349		1	1349	0		1349
1351		1	1351	0		1351
1352		1	1352	0		1352
1356		1	1356	0		1356
1358		1	1358	0		1358
1359		1	1359	0		1359
1360		2	2720	0		2720
1361		1	1361	0		1361
1364		8	10912	0		10912
1365		1	1365	0		1365
1366		2	2732	0		2732
1367		1	1367	0		1367
1368		1	1368	0		1368
1370		3	4110	0		4110
1372		1	1372	0		1372
1373		1	1373	0		1373
1375		4	5500	0		5500
1377		2	2754	0		2754
1383		1	1383	0		1383
1389		5	6945	0		6945
1390		1	1390	0		1390
1392		5	6960	0		6960
1397		3	4191	0		4191
1398		3	4194	0		4194
1400		1	1400	0		1400
1401		1	1401	0		1401
1403		1	1403	0		1403
1405		1	1405	0		1405
1406		1	1406	0		1406
1407		1	1407	0		1407
1408		4	5632	0		5632
1410		1	1410	0		1410
1411		1	1411	0		1411
1412		1	1412	0		1412
1414		1	1414	0		1414
1415		1	1415	0		1415
1416		2	2832	0		2832
1419		1	1419	0		1419
1420		1	1420	0		1420
1423		1	1423	0		1423
1426		1	1426	0		1426
1429		1	1429	0		1429
1430		1	1430	0		1430
1434		1	1434	0		1434
1436		1	1436	0		1436
1444		1	1444	0		1444
1445		1	1445	0		1445
1446		2	2892	0		2892
1448		1	1448	0		1448
1450		6	8700	0		8700
1453		7	10171	0		10171
1456		1	1456	0		1456
1457		1	1457	0		1457
1459		2	2918	0		2918
1460		1	1460	0		1460
1461		1	1461	0		1461
1462		1	1462	0		1462
1463		1	1463	0		1463
1464		2	2928	0		2928
1467		2	2934	0		2934
1468		1	1468	0		1468
1469		1	1469	0		1469
1475		1	1475	0		1475
1479		1	1479	0		1479
1481		3	4443	0		4443
1483		1	1483	0		1483
1486		5	7430	0		7430
1490		1	1490	0		1490
1493		2	2986	0		2986
1495		4	5980	0		5980
1498		3	4494	0		4494
1499		2	2998	0		2998
1500		10	15000	0		15000
1504		2	3008	0		3008
1506		6	9036	0		9036
1507		3	4521	0		4521
1508		1	1508	0		1508
1509		1	1509	0		1509
1510		2	3020	0		3020
1511		1	1511	0		1511
1512		3	4536	0		4536
1514		1	1514	0		1514
1517		2	3034	0		3034
1518		1	1518	0		1518
1520		1	1520	0		1520
1524		1	1524	0		1524
1525		2	3050	0		3050
1527		1	1527	0		1527
1528		1	1528	0		1528
1533		1	1533	0		1533
1535		1	1535	0		1535
1537		1	1537	0		1537
1538		1	1538	0		1538
1544		2	3088	0		3088
1545		1	1545	0		1545
1546		1	1546	0		1546
1551		3	4653	0		4653
1563		1	1563	0		1563
1564		2	3128	0		3128
1567		1	1567	0		1567
1571		1	1571	0		1571
1574		1	1574	0		1574
1575		1	1575	0		1575
1579		1	1579	0		1579
1582		1	1582	0		1582
1583		1	1583	0		1583
1584		4	6336	0		6336
1585		2	3170	0		3170
1589		3	4767	0		4767
1590		1	1590	0		1590
1592		1	1592	0		1592
1595		2	3190	0		3190
1597		2	3194	0		3194
1599		1	1599	0		1599
1600		1	1600	0		1600
1604		2	3208	0		3208
1607		2	3214	0		3214
1608		2	3216	0		3216
1621		2	3242	0		3242
1623		2	3246	0		3246
1632		2	3264	0		3264
1640		3	4920	0		4920
1644		1	1644	0		1644
1649		1	1649	0		1649
1650		3	4950	0		4950
1651		1	1651	0		1651
1666		2	3332	0		3332
1679		1	1679	0		1679
1680		3	5040	0		5040
1681		1	1681	0		1681
1682		1	1682	0		1682
1683		3	5049	0		5049
1684		1	1684	0		1684
1685		1	1685	0		1685
1691		1	1691	0		1691
1700		2	3400	0		3400
1711		1	1711	0		1711
1712		1	1712	0		1712
1713		1	1713	0		1713
1715		1	1715	0		1715
1718		1	1718	0		1718
1720		1	1720	0		1720
1721		5	8605	0		8605
1722		1	1722	0		1722
1731		1	1731	0		1731
1732		1	1732	0		1732
1737		1	1737	0		1737
1753		1	1753	0		1753
1756		1	1756	0		1756
1757		2	3514	0		3514
1758		1	1758	0		1758
1764		1	1764	0		1764
1766		1	1766	0		1766
1767		2	3534	0		3534
1775		1	1775	0		1775
1777		10	17770	0		17770
1780		1	1780	0		1780
1783		1	1783	0		1783
1787		1	1787	0		1787
1792		1	1792	0		1792
1795		1	1795	0		1795
1797		1	1797	0		1797
1825		3	5475	0		5475
1829		1	1829	0		1829
1832		1	1832	0		1832
1835		2	3670	0		3670
1839		1	1839	0		1839
1841		1	1841	0		1841
1842		1	1842	0		1842
1848		1	1848	0		1848
1851		1	1851	0		1851
1852		2	3704	0		3704
1855		1	1855	0		1855
1856		2	3712	0		3712
1859		1	1859	0		1859
1861		1	1861	0		1861
1862		1	1862	0		1862
1863		2	3726	0		3726
1865		1	1865	0		1865
1867		1	1867	0		1867
1868		1	1868	0		1868
1874		5	9370	0		9370
1878		2	3756	0		3756
1883		2	3766	0		3766
1884		1	1884	0		1884
1889		5	9445	0		9445
1890		7	13230	0		13230
1897		1	1897	0		1897
1899		1	1899	0		1899
1904		1	1904	0		1904
1906		19	36214	0		36214
1916		1	1916	0		1916
1919		1	1919	0		1919
1924		1	1924	0		1924
1934		4	7736	0		7736
1945		1	1945	0		1945
1957		1	1957	0		1957
1964		1	1964	0		1964
1972		3	5916	0		5916
1979		1	1979	0		1979
1986		2	3972	0		3972
1992		1	1992	0		1992
1995		1	1995	0		1995
1997		1	1997	0		1997
1999		4	7996	0		7996
2002		2	4004	0		4004
2008		1	2008	0		2008
2013		1	2013	0		2013
2021		1	2021	0		2021
2024		3	6072	0		6072
2028		1	2028	0		2028
2030		1	2030	0		2030
2031		1	2031	0		2031
2039		1	2039	0		2039
2042		1	2042	0		2042
2048		1	2048	0		2048
2052		1	2052	0		2052
2067		2	4134	0		4134
2077		2	4154	0		4154
2079		2	4158	0		4158
2080		1	2080	0		2080
2081		2	4162	0		4162
2084		8	16672	0		16672
2086		1	2086	0		2086
2104		2	4208	0		4208
2113		1	2113	0		2113
2115		1	2115	0		2115
2119		2	4238	0		4238
2125		1	2125	0		2125
2131		1	2131	0		2131
2132		1	2132	0		2132
2140		1	2140	0		2140
2143		1	2143	0		2143
2144		1	2144	0		2144
2154		2	4308	0		4308
2157		1	2157	0		2157
2172		1	2172	0		2172
2191		1	2191	0		2191
2199		1	2199	0		2199
2205		1	2205	0		2205
2206		1	2206	0		2206
2221		1	2221	0		2221
2237		1	2237	0		2237
2248		2	4496	0		4496
2250		1	2250	0		2250
2251		2	4502	0		4502
2253		1	2253	0		2253
2273		3	6819	0		6819
2279		4	9116	0		9116
2283		2	4566	0		4566
2291		1	2291	0		2291
2294		2	4588	0		4588
2305		1	2305	0		2305
2329		5	11645	0		11645
2341		1	2341	0		2341
2358		1	2358	0		2358
2361		2	4722	0		4722
2372		1	2372	0		2372
2374		1	2374	0		2374
2381		1	2381	0		2381
2387		1	2387	0		2387
2452		1	2452	0		2452
2464		1	2464	0		2464
2477		1	2477	0		2477
2479		1	2479	0		2479
2481		2	4962	0		4962
2482		2	4964	0		4964
2484		1	2484	0		2484
2489		1	2489	0		2489
2490		2	4980	0		4980
2494		2	4988	0		4988
2504		1	2504	0		2504
2510		2	5020	0		5020
2514		1	2514	0		2514
2532		1	2532	0		2532
2544		1	2544	0		2544
2567		1	2567	0		2567
2574		1	2574	0		2574
2581		2	5162	0		5162
2630		1	2630	0		2630
2678		1	2678	0		2678
2684		2	5368	0		5368
2740		1	2740	0		2740
2746		1	2746	0		2746
2774		6	16644	0		16644
2780		1	2780	0		2780
2788		1	2788	0		2788
2806		1	2806	0		2806
2831		1	2831	0		2831
2841		1	2841	0		2841
2860		1	2860	0		2860
2862		1	2862	0		2862
2875		1	2875	0		2875
2887		1	2887	0		2887
2906		1	2906	0		2906
2940		1	2940	0		2940
2951		1	2951	0		2951
2964		1	2964	0		2964
2970		11	32670	0		32670
2989		1	2989	0		2989
2993		1	2993	0		2993
2996		1	2996	0		2996
3000		1	3000	0		3000
3004		1	3004	0		3004
3010		1	3010	0		3010
3034		1	3034	0		3034
3043		1	3043	0		3043
3066		1	3066	0		3066
3067		1	3067	0		3067
3068		1	3068	0		3068
3071		1	3071	0		3071
3073		1	3073	0		3073
3081		1	3081	0		3081
3090		2	6180	0		6180
3095		2	6190	0		6190
3107		1	3107	0		3107
3114		1	3114	0		3114
3136		1	3136	0		3136
3143		1	3143	0		3143
3150		1	3150	0		3150
3156		1	3156	0		3156
3162		1	3162	0		3162
3174		1	3174	0		3174
3240		1	3240	0		3240
3317		1	3317	0		3317
3326		1	3326	0		3326
3328		1	3328	0		3328
3387		1	3387	0		3387
3398		1	3398	0		3398
3436		1	3436	0		3436
3487		1	3487	0		3487
3530		1	3530	0		3530
3535		1	3535	0		3535
3555		1	3555	0		3555
3634		1	3634	0		3634
3680		1	3680	0		3680
3683		1	3683	0		3683
3689		1	3689	0		3689
3704		1	3704	0		3704
3725		1	3725	0		3725
3785		1	3785	0		3785
3829		1	3829	0		3829
3853		1	3853	0		3853
3896		1	3896	0		3896
3954		1	3954	0		3954
3961		1	3961	0		3961
3999		1	3999	0		3999
4022		1	4022	0		4022
4074		2	8148	0		8148
4107		1	4107	0		4107
4120		1	4120	0		4120
4152		1	4152	0		4152
4180		1	4180	0		4180
4257		1	4257	0		4257
4318		1	4318	0		4318
4350		2	8700	0		8700
4373		1	4373	0		4373
4384		1	4384	0		4384
4388		1	4388	0		4388
4395		1	4395	0		4395
4456		1	4456	0		4456
4473		1	4473	0		4473
4553		2	9106	0		9106
4706		1	4706	0		4706
4798		2	9596	0		9596
4845		1	4845	0		4845
5058		1	5058	0		5058
5103		1	5103	0		5103
5193		1	5193	0		5193
5405		1	5405	0		5405
5516		1	5516	0		5516
5692		1	5692	0		5692
5695		1	5695	0		5695
5933		1	5933	0		5933
7773		1	7773	0		7773
11323		1	11323	0		11323
11358		2	22716	0		22716
11799		1	11799	0		11799
14180		1	14180	0		14180
18671		2	37342	0		37342
20480		1	20480	0		20480
			845045800			8.42574e+08
