# Supplementary material for: Repetitive Elements May Comprise Over Two-Thirds of the Human Genome
Source: PLoS Genet. 2011 Dec 1;7(12):e1002384. doi: 10.1371/journal.pgen.1002384 (PMC3228813; doi:10.1371/journal.pgen.1002384)
Supplement: Table S9 — Details of MIR ESP analysis on the RepeatMasked portion of the human genome (with false positive predictions and expected true positives). (XLSX) [file pgen.1002384.s011.xlsx]

## Sheet: Sheet1
Supplementary Table S9. ESP annotated MIR repetitive elements in the RM-masked human genome with FP probability from simulation
Element length	# found	# bp found		# FP elements	# FP bps	% FPs (bps)	Cumulative FP/total		Expected TP bps	Expected TP elements
24	1548720	37169280		1363751	32730024	0.143892	0.219948		4439256	184969
25	985078	24626950		836916	20922900	0.091984	0.360551		3704050	148162
26	806638	20972588		650409	16910634	0.0743448	0.474191		4061954	156229
27	680536	18374472		522288	14101776	0.0619961	0.568956		4272696	158248
28	558714	15643992		404603	11328884	0.0498055	0.645087		4315108	154111
29	451641	13097589		306530	8889370	0.0390806	0.704824		4208219	145111
30	366063	10981890		232122	6963660	0.0306146	0.75162		4018230	133941
31	291202	9027262		170211	5276541	0.0231974	0.787078		3750721	120991
32	230490	7375680		124179	3973728	0.0174698	0.813782		3401952	106311
33	178866	5902578		89173	2942709	0.0129371	0.833557		2959869	89693
34	137585	4677890		63267	2151078	0.00945685	0.848013		2526812	74318
35	111821	3913735		48731	1705585	0.00749832	0.859474		2208150	63090
36	93677	3372372		39070	1406520	0.00618353	0.868926		1965852	54607
37	80428	2975836		32612	1206644	0.00530481	0.877035		1769192	47816
38	70276	2670488		28206	1071828	0.00471211	0.884238		1598660	42070
39	62733	2446587		25685	1001715	0.00440387	0.890969		1444872	37048
40	56904	2276160		23528	941120	0.00413748	0.897294		1335040	33376
41	53425	2190425		22260	912660	0.00401236	0.903427		1277765	31165
42	50205	2108610		21803	915726	0.00402584	0.90958		1192884	28402
43	48473	2084339		20895	898485	0.00395004	0.915618		1185854	27578
44	46623	2051412		20485	901340	0.00396259	0.921675		1150072	26138
45	45727	2057715		20400	918000	0.00403583	0.927844		1139715	25327
46	44929	2066734		20399	938354	0.00412532	0.93415		1128380	24530
47	44352	2084544		19856	933232	0.0041028	0.940422		1151312	24496
48	43823	2103504		20026	961248	0.00422597	0.946881		1142256	23797
49	41175	2017575		18499	906451	0.00398506	0.952973		1111124	22676
50	38676	1933800		16732	836600	0.00367797	0.958595		1097200	21944
51	35032	1786632		15026	766326	0.00336902	0.963744		1020306	20006
52	32268	1677936		12856	668512	0.002939	0.968237		1009424	19412
53	28728	1522584		11067	586551	0.00257867	0.972178		936033	17661
54	25863	1396602		9201	496854	0.00218434	0.975517		899748	16662
55	22737	1250535		7778	427790	0.00188071	0.978392		822745	14959
56	20248	1133888		6515	364840	0.00160396	0.980844		769048	13733
57	17515	998355		5473	311961	0.00137148	0.98294		686394	12042
58	15571	903118		4511	261638	0.00115025	0.984698		641480	11060
59	13692	807828		3934	232106	0.00102042	0.986258		575722	9758
60	12211	732660		3246	194760	0.00085623	0.987567		537900	8965
61	10852	661972		2863	174643	0.000767789	0.988741		487329	7989
62	9842	610204		2518	156116	0.000686338	0.98979		454088	7324
63	8722	549486		2174	136962	0.00060213	0.99071		412524	6548
64	7909	506176		1955	125120	0.000550069	0.991551		381056	5954
65	7207	468455		1717	111605	0.000490653	0.992301		356850	5490
66	6572	433752		1565	103290	0.000454097	0.992995		330462	5007
67	5990	401330		1440	96480	0.000424158	0.993643		304850	4550
68	5788	393584		1294	87992	0.000386842	0.994235		305592	4494
69	5222	360318		1157	79833	0.000350972	0.994771		280485	4065
70	4907	343490		1090	76300	0.00033544	0.995284		267190	3817
71	4491	318861		955	67805	0.000298093	0.99574		251056	3536
72	4176	300672		915	65880	0.00028963	0.996182		234792	3261
73	3782	276086		819	59787	0.000262844	0.996584		216299	2963
74	3590	265660		730	54020	0.00023749	0.996947		211640	2860
75	3082	231150		614	46050	0.000202451	0.997257		185100	2468
76	2889	219564		550	41800	0.000183767	0.997537		177764	2339
77	2644	203588		514	39578	0.000173998	0.997803		164010	2130
78	2394	186732		457	35646	0.000156712	0.998043		151086	1937
79	2171	171509		374	29546	0.000129894	0.998242		141963	1797
80	2063	165040		313	25040	0.000110084	0.99841		140000	1750
81	1835	148635		320	25920	0.000113953	0.998584		122715	1515
82	1658	135956		272	22304	9.80558e-05	0.998734		113652	1386
83	1550	128650		226	18758	8.24664e-05	0.99886		109892	1324
84	1453	122052		217	18228	8.01363e-05	0.998982		103824	1236
85	1276	108460		161	13685	6.01638e-05	0.999074		94775	1115
86	1121	96406		185	15910	6.99456e-05	0.999181		80496	936
87	996	86652		141	12267	5.39298e-05	0.999264		74385	855
88	996	87648		115	10120	4.44909e-05	0.999332		77528	881
89	841	74849		107	9523	4.18663e-05	0.999396		65326	734
90	810	72900		111	9990	4.39194e-05	0.999463		62910	699
91	707	64337		89	8099	3.56059e-05	0.999517		56238	618
92	691	63572		77	7084	3.11436e-05	0.999565		56488	614
93	575	53475		64	5952	2.6167e-05	0.999605		47523	511
94	551	51794		45	4230	1.85965e-05	0.999633		47564	506
95	479	45505		50	4750	2.08826e-05	0.999665		40755	429
96	445	42720		52	4992	2.19465e-05	0.999699		37728	393
97	404	39188		46	4462	1.96164e-05	0.999729		34726	358
98	392	38416		34	3332	1.46486e-05	0.999751		35084	358
99	347	34353		32	3168	1.39276e-05	0.999772		31185	315
100	317	31700		29	2900	1.27494e-05	0.999792		28800	288
101	289	29189		36	3636	1.59851e-05	0.999816		25553	253
102	284	28968		22	2244	9.86537e-06	0.999831		26724	262
103	254	26162		33	3399	1.49431e-05	0.999854		22763	221
104	229	23816		23	2392	1.0516e-05	0.99987		21424	206
105	245	25725		18	1890	8.30907e-06	0.999883		23835	227
106	187	19822		12	1272	5.59213e-06	0.999892		18550	175
107	208	22256		14	1498	6.58571e-06	0.999902		20758	194
108	189	20412		13	1404	6.17245e-06	0.999911		19008	176
109	164	17876		13	1417	6.2296e-06	0.999921		16459	151
110	138	15180		11	1210	5.31956e-06	0.999929		13970	127
111	124	13764		8	888	3.90394e-06	0.999935		12876	116
112	114	12768		6	672	2.95434e-06	0.999939		12096	108
113	108	12204		10	1130	4.96786e-06	0.999947		11074	98
114	89	10146		6	684	3.00709e-06	0.999951		9462	83
115	91	10465		6	690	3.03347e-06	0.999956		9775	85
116	83	9628		4	464	2.0399e-06	0.999959		9164	79
117	81	9477		4	468	2.05748e-06	0.999962		9009	77
118	83	9794		7	826	3.63137e-06	0.999968		8968	76
119	61	7259		4	476	2.09265e-06	0.999971		6783	57
120	75	9000		3	360	1.58268e-06	0.999974		8640	72
121	63	7623		0	0	0	0.999974		7623	63
122	58	7076		2	244	1.07271e-06	0.999975		6832	56
123	57	7011		0	0	0	0.999975		7011	57
124	43	5332		2	248	1.09029e-06	0.999977		5084	41
125	42	5250		0	0	0	0.999977		5250	42
126	46	5796		3	378	1.66181e-06	0.999979		5418	43
127	35	4445		3	381	1.675e-06	0.999982		4064	32
128	36	4608		2	256	1.12546e-06	0.999984		4352	34
129	37	4773		1	129	5.67127e-07	0.999985		4644	36
130	21	2730		0	0	0	0.999985		2730	21
131	23	3013		1	131	5.75919e-07	0.999985		2882	22
132	21	2772		4	528	2.32126e-06	0.999989		2244	17
133	27	3591		3	399	1.75414e-06	0.999992		3192	24
134	23	3082		2	268	1.17822e-06	0.999993		2814	21
135	18	2430		1	135	5.93505e-07	0.999994		2295	17
136	24	3264		1	136	5.97901e-07	0.999995		3128	23
137	15	2055		1	137	6.02297e-07	0.999996		1918	14
138	21	2898		0	0	0	0.999996		2898	21
139	10	1390		1	139	6.1109e-07	0.999997		1251	9
140	20	2800		0	0	0	0.999997		2800	20
141	16	2256		1	141	6.19883e-07	0.999998		2115	15
142	8	1136		1	142	6.24279e-07	0.999999		994	7
143	8	1144		0	0	0	0.999999		1144	8
144	11	1584		0	0	0	0.999999		1584	11
145	9	1305		0	0	0	0.999999		1305	9
146	9	1314		0	0	0	0.999999		1314	9
147	9	1323		0	0	0	0.999999		1323	9
148	4	592		1	148	6.50657e-07	1		444	3
149	5	745		0	0	0	1		745	5
150	12	1800		0	0	0	1		1800	12
151	5	755		0	0	0	1		755	5
152	6	912		0	0	0	1		912	6
153	5	765		0	0	0	1		765	5
154	7	1078		0	0	0	1		1078	7
155	3	465		0	0	0	1		465	3
156	2	312		0	0	0	1		312	2
157	4	628		0	0	0	1		628	4
158	4	632		0	0	0	1		632	4
159	8	1272		0	0	0	1		1272	8
160	1	160		0	0	0	1		160	1
161	1	161		0	0	0	1		161	1
162	3	486		0	0	0	1		486	3
163	2	326		0	0	0	1		326	2
164	3	492		0	0	0	1		492	3
165	2	330		0	0	0	1		330	2
166	3	498		0	0	0	1		498	3
167	1	167		0	0	0	1		167	1
168	1	168		0	0	0	1		168	1
169	0	0		0	0	0	1		0	0
170	2	340		0	0	0	1		340	2
171	6	1026		0	0	0	1		1026	6
172	4	688		0	0	0	1		688	4
173	1	173		0	0	0	1		173	1
174	2	348		0	0	0	1		348	2
175	3	525		0	0	0	1		525	3
176	2	352		0	0	0	1		352	2
177	4	708		0	0	0	1		708	4
178	0	0		0	0	0	1		0	0
179	2	358		0	0	0	1		358	2
180	4	720		0	0	0	1		720	4
181	2	362		0	0	0	1		362	2
182	5	910		0	0	0	1		910	5
183	2	366		0	0	0	1		366	2
184	2	368		0	0	0	1		368	2
185	0	0		0	0	0	1		0	0
186	0	0		0	0	0	1		0	0
187	0	0		0	0	0	1		0	0
188	0	0		0	0	0	1		0	0
189	0	0		0	0	0	1		0	0
190	0	0		0	0	0	1		0	0
191	1	191		0	0	0	1		191	1
192	0	0		0	0	0	1		0	0
193	0	0		0	0	0	1		0	0
194	1	194		0	0	0	1		194	1
195	2	390		0	0	0	1		390	2
196	1	196		0	0	0	1		196	1
197	0	0		0	0	0	1		0	0
198	2	396		0	0	0	1		396	2
199	0	0		0	0	0	1		0	0
200	0	0		0	0	0	1		0	0
201	1	201		0	0	0	1		201	1
202	0	0		0	0	0	1		0	0
203	0	0		0	0	0	1		0	0
204	1	204		0	0	0	1		204	1
205	0	0		0	0	0	1		0	0
206	1	206		0	0	0	1		206	1
207	0	0		0	0	0	1		0	0
208	0	0		0	0	0	1		0	0
209	0	0		0	0	0	1		0	0
210	1	210		0	0	0	1		210	1
211	0	0		0	0	0	1		0	0
212	0	0		0	0	0	1		0	0
213	0	0		0	0	0	1		0	0
214	0	0		0	0	0	1		0	0
215	0	0		0	0	0	1		0	0
216	1	216		0	0	0	1		216	1
217	0	0		0	0	0	1		0	0
218	5	1090		0	0	0	1		1090	5
219	1	219		0	0	0	1		219	1
220	1	220		0	0	0	1		220	1
221	0	0		0	0	0	1		0	0
222	1	222		0	0	0	1		222	1
223	1	223		0	0	0	1		223	1
224	2	448		0	0	0	1		448	2
225	0	0		0	0	0	1		0	0
226	0	0		0	0	0	1		0	0
227	0	0		0	0	0	1		0	0
228	0	0		0	0	0	1		0	0
229	0	0		0	0	0	1		0	0
230	0	0		0	0	0	1		0	0
231	0	0		0	0	0	1		0	0
232	0	0		0	0	0	1		0	0
233	0	0		0	0	0	1		0	0
234	0	0		0	0	0	1		0	0
235	0	0		0	0	0	1		0	0
236	0	0		0	0	0	1		0	0
237	0	0		0	0	0	1		0	0
238	0	0		0	0	0	1		0	0
239	0	0		0	0	0	1		0	0
240	0	0		0	0	0	1		0	0
241	0	0		0	0	0	1		0	0
242	0	0		0	0	0	1		0	0
243	1	243		0	0	0	1		243	1
244	0	0		0	0	0	1		0	0
245	0	0		0	0	0	1		0	0
246	1	246		0	0	0	1		246	1
247	0	0		0	0	0	1		0	0
248	0	0		0	0	0	1		0	0
249	1	249		0	0	0	1		249	1
250	1	250		0	0	0	1		250	1
251	0	0		0	0	0	1		0	0
252	0	0		0	0	0	1		0	0
253	0	0		0	0	0	1		0	0
254	1	254		0	0	0	1		254	1
255	0	0		0	0	0	1		0	0
256	0	0		0	0	0	1		0	0
257	0	0		0	0	0	1		0	0
258	1	258		0	0	0	1		258	1
259	0	0		0	0	0	1		0	0
260	0	0		0	0	0	1		0	0
261	1	261		0	0	0	1		261	1
262	0	0		0	0	0	1		0	0
263	0	0		0	0	0	1		0	0
264	0	0		0	0	0	1		0	0
265	0	0		0	0	0	1		0	0
266	1	266		0	0	0	1		266	1
267	0	0		0	0	0	1		0	0
268	0	0		0	0	0	1		0	0
269	0	0		0	0	0	1		0	0
271	0	0		0	0	0	1		0	0
273	0	0		0	0	0	1		0	0
274	0	0		0	0	0	1		0	0
275	0	0		0	0	0	1		0	0
276	2	552		0	0	0	1		552	2
281	0	0		0	0	0	1		0	0
282	0	0		0	0	0	1		0	0
283	0	0		0	0	0	1		0	0
295	0	0		0	0	0	1		0	0
	7518344	227462347			148808277				78654070	2249431
						Ave FP:
						0.654211		RM totals:	82971445	589622
								(genome-wide)
								P-clouds/RM:	0.947966	3.81504
								NOTE: P-clouds
								was run on the
								RM masked
								sequence only
